# Supplementary material
Source: publisher figshare collection journal article supplement (https://gsajournals.figshare.com/articles/dataset/_/7086647)

**Figure S1**

**Genotyping *aex-2* knock-in alleles**

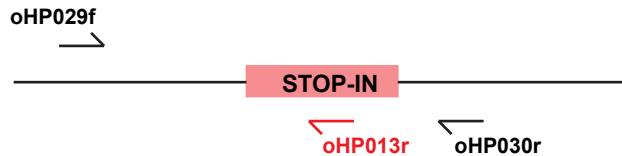

outer primer pair: oHP029f + oHP030r for 246 bp knock-in

outer + inner primer pair: oHP029f + oHP013r for 204 bp knock-in

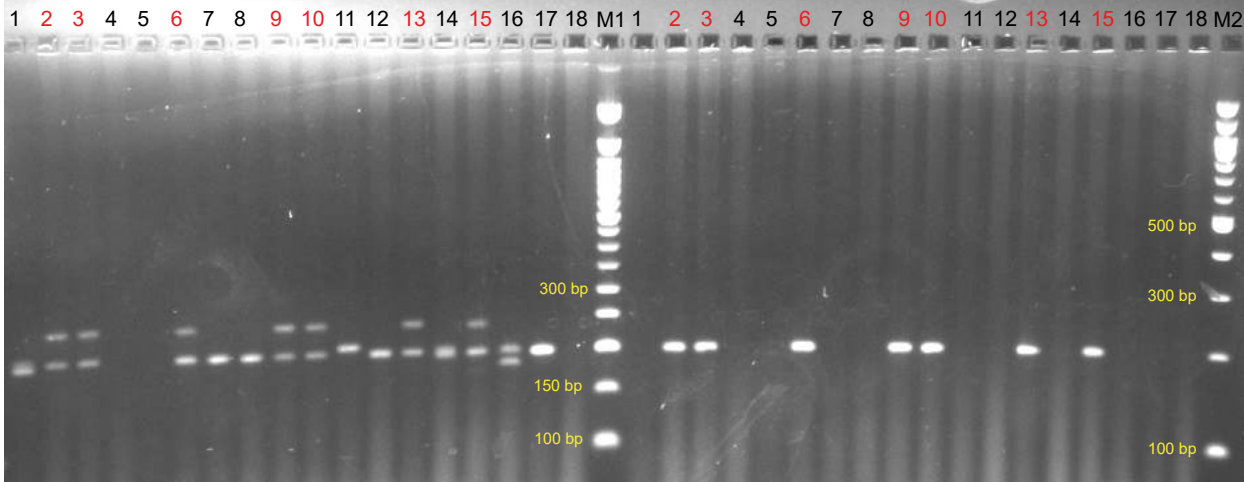

Figure S2

### Genotyping *C01B10.10* knock-in alleles

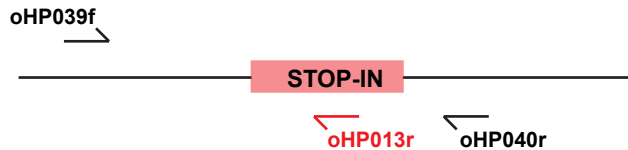

outer primer pair: oHP039f + oHP040r for 214 bp knock-in

outer + inner primer pair: oHP039f + oHP013r for 190 bp knock-in

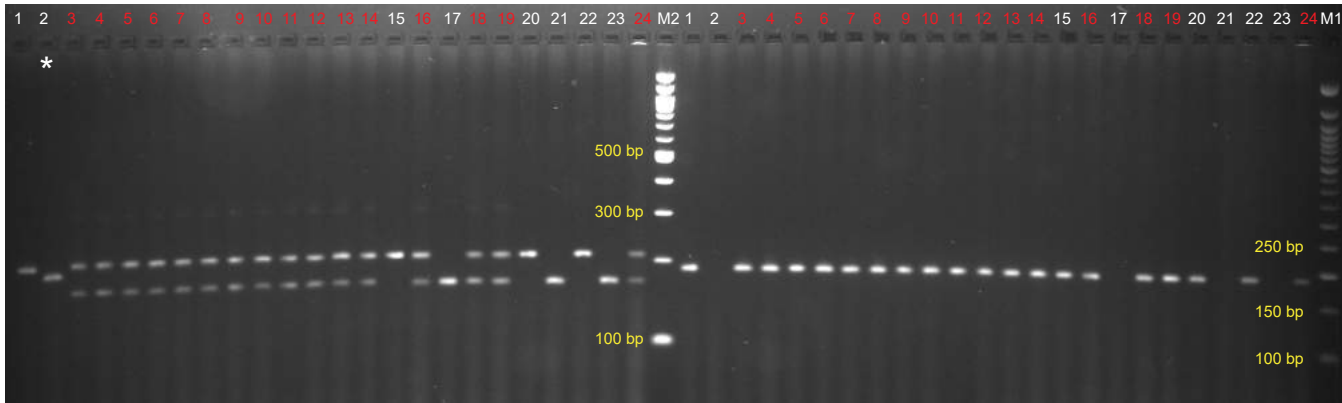

Supplement: Supplementary file 1 [file 1]
